# Supplementary material for: Rapid hydrolysis of model phosphate diesters by alkaline-earth cations in aqueous DMSO: speciation and kinetics
Source: Royal Society of Chemistry journal article supplement (doi:10.1039/b807030j), 2008-01-01
Supplement: b807030j.pdf [file b807030j.pdf]

## Supplementary Information

### Rapid hydrolysis of model phosphate diesters by alkaline earth cations in aqueous DMSO: speciation and kinetics

Olga Taran, <sup>a</sup> Felipe Medrano <sup>b</sup> and Anatoly K. Yatsimirsky \* <sup>a</sup>

<sup>a</sup> Facultad de Química, Universidad Nacional Autónoma de México, 04510 México D.F., México.

E-mail: anatoli@servidor.unam.mx

<sup>b</sup> Centro de Investigaciones Químicas, Universidad Autónoma del Estado de Morelos, 62209; Cuernavaca, Morelos, México.

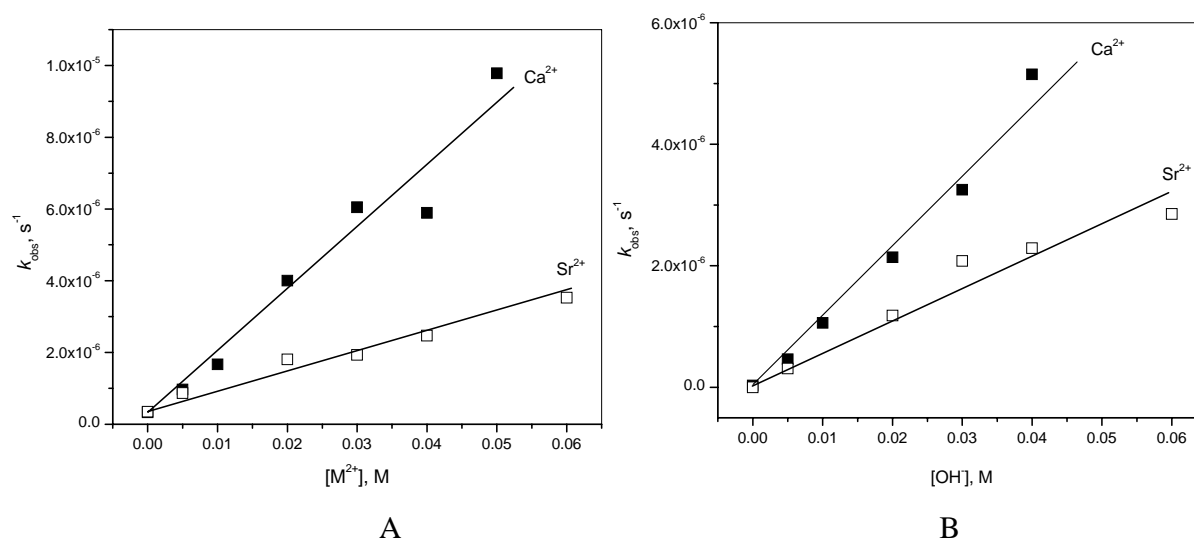

**Fig. S1.** Kinetics of BNPP hydrolysis in the presence of  $Ca^{2+}$  and  $Sr^{2+}$  in water at variable metal ion and hydroxide concentrations at 37°C. (A) Variable metal in the presence of 10 mM NaOH (B) Variable NaOH in the presence of 5 mM metal ion.

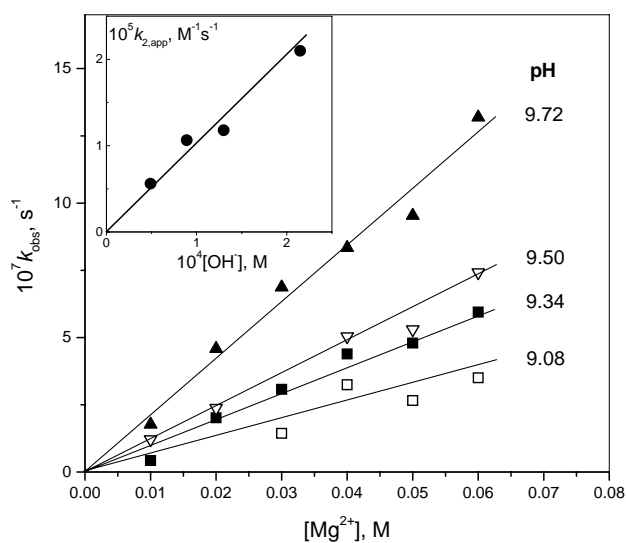

**Fig. S2.** Kinetics of BNPP hydrolysis in the presence of  $\text{Mg}^{2+}$  at variable metal ion concentration and pH in 0.05 M TRIS at 37°C. Inset: plot of the observed second-order rate constant vs. concentration of free hydroxide ions. The linearity of plots at each given pH value confirms the first order kinetics in  $\text{Mg}(\text{II})$  and the slopes of these plots ( $k_{2,\text{app}}$ ) are directly proportional to concentrations of hydroxide ions corresponding to each pH value (see inset).

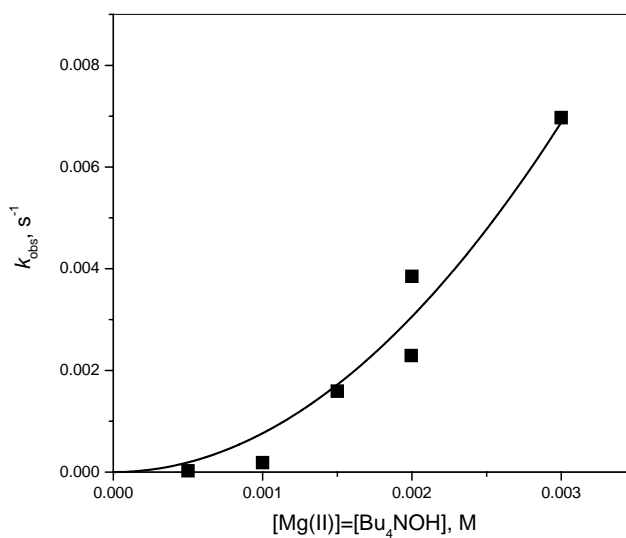

**Fig. S3.** Observed first-order rate constants for BNPP cleavage in 90 % DMSO measured at variable concentration of  $\text{Mg}(\text{ClO}_4)_2$  in the presence of 1 mol equivalent of  $\text{Bu}_4\text{NOH}$ .

**Table S1.** Results of potentiometric titrations of alkaline earth cations in 90% vol DMSO.

The mean values of  $\log\beta_{pq}$  are given with standard errors. Fitting errors in  $\log\beta_{pq}$  calculated by Hyperquad in each titration experiment were less than 0.05. Goodness of fit is measured in Hyperquad by *sigma*, the value of the scaled sum of squares, which is given in the table together with  $\log\beta_{pq}$  values for each titration.

|                                              |              | $\log\beta_{pq}$   |                  |                  |                  |
|----------------------------------------------|--------------|--------------------|------------------|------------------|------------------|
| <b>[Mg(ClO<sub>4</sub>)<sub>2</sub>], mM</b> | <b>sigma</b> | <b>1 -1</b>        | <b>1 -2</b>      | <b>2 -5</b>      | <b>1 -3</b>      |
| 0.6                                          | 14.08        | -11.50             | -22.41           | -58.34           | -39.32           |
| 1.0                                          | 2.51         | -11.49             | -22.98           | -60.40           | -41.23           |
| 1.13                                         | 2.93         | -11.46             | -22.48           | -60.23           | -40.59           |
| 2.23                                         | 4.84         |                    | -22.30           | -58.90           | -41.10           |
| <b>mean</b>                                  |              | <b>-11.48±0.01</b> | <b>-22.5±0.2</b> | <b>-59.5±0.4</b> | <b>-40.6±0.4</b> |
|                                              |              |                    |                  |                  |                  |
| <b>[Ca(ClO<sub>4</sub>)<sub>2</sub>], mM</b> | <b>sigma</b> | <b>2 -1</b>        | <b>1 -1</b>      | <b>1 -2</b>      | <b>2 -5</b>      |
| 0.53                                         | 2.15         | -7.49              | -11.71           | -26.10           | -67.50           |
| 1.0                                          | 1.35         | -8.42              | -12.70           | -26.70           | -66.10           |
| 1.0                                          | 2.51         | -8.10              | -11.85           | -26.10           | -66.65           |
| 1.02                                         | 59.86        | -8.42              | -12.54           | -26.20           | -67.90           |
| 1.93                                         | 14.60        | -9.00              | -12.53           | -26.40           | -69.50           |
| <b>mean</b>                                  |              | <b>-8.3±0.2</b>    | <b>-12.3±0.2</b> | <b>-26.3±0.1</b> | <b>-67.5±0.6</b> |
|                                              |              |                    |                  |                  |                  |
| <b>[Sr(ClO<sub>4</sub>)<sub>2</sub>], mM</b> | <b>sigma</b> | <b>2 -1</b>        | <b>1 -1</b>      | <b>2 -5</b>      |                  |
| 0.5                                          | 1.78         | -7.92              | -12.76           | -73.85           |                  |
| 1.0                                          | 1.63         | -8.40              | -13.87           | -77.02           |                  |
| 1.93                                         | 14.28        | -10.38             | -14.00           | -75.10           |                  |
| <b>mean</b>                                  |              | <b>-8.9±0.8</b>    | <b>-13.5±0.4</b> | <b>-75.3±0.9</b> |                  |

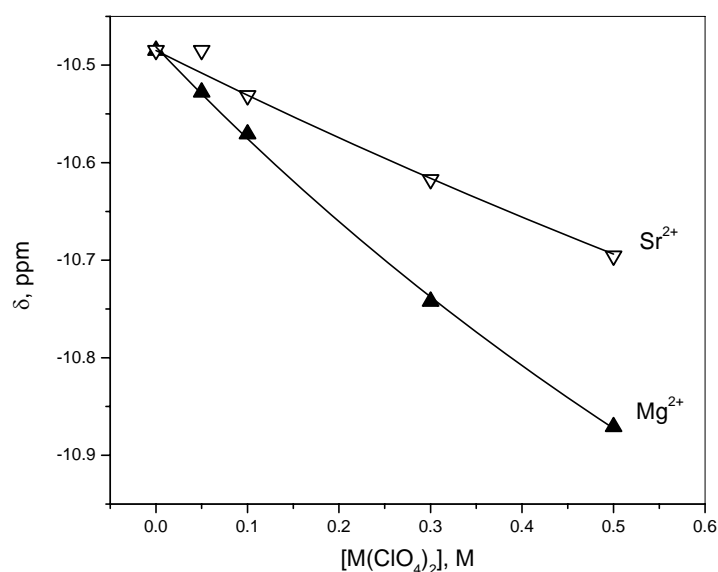

**Fig. S4.** <sup>31</sup>P NMR shifts of 5 mM BNPP at variable concentrations of Mg(II) and Sr(II) perchlorates in D<sub>2</sub>O at 37°C. Solid lines are best fits to the theoretical equation (S1).

$$\delta_{\text{obs}} = (\delta_{\text{S}} + \delta_{\text{MS}}K_{\text{S}}[\text{M(II)}]) / (1 + K_{\text{S}}[\text{M(II)}]) \quad (\text{S1})$$

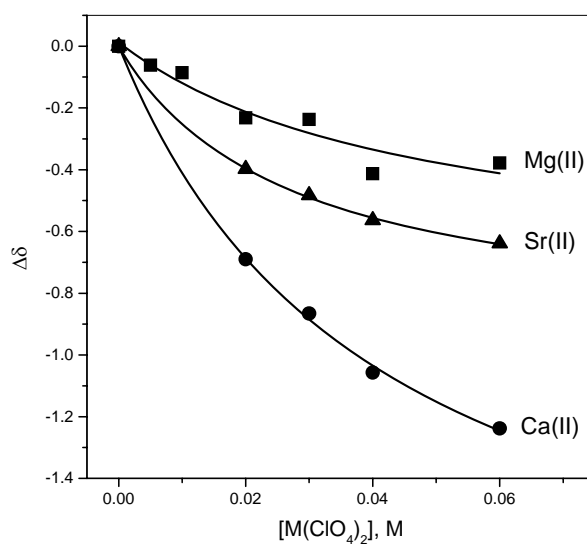

**Fig. S5.** <sup>31</sup>P NMR titrations of 5 mM BNPP by metal perchlorates in 90% DMSO/D<sub>2</sub>O at 37°C. Solid lines are best fits to the theoretical equation (S1).

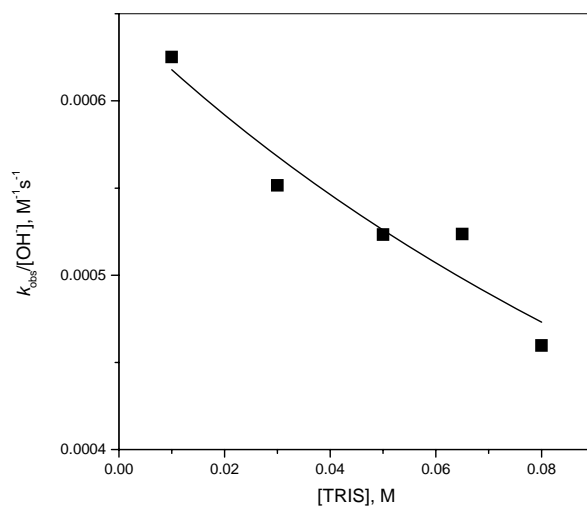

**Fig. S6.** Kinetics of BNPP hydrolysis in the presence of 5 mM  $\text{Mg}^{2+}$  at variable TRIS concentration and pH 9.0 at 37°C.
